# Supplementary material for: Supercritical Fluid Extraction of Oils from Cactus Opuntia ficus-indica L. and Opuntia dillenii Seeds
Source: MDPI journal article supplement (doi:10.3390/foods12030618), 2023-02-01
Supplement: s1 [file s1]

# Supercritical Fluid Extraction of Oils from *Cactus Opuntia ficus-indica* L and *Opuntia dillenii* Seeds

Ghanya Al-Naqeb <sup>1,2,\*</sup>, Cinzia Cafarella <sup>3</sup>, Eugenio Aprea <sup>1</sup>, Giovanna Ferrentino <sup>4,\*</sup>, Alessandra Gasparini <sup>4</sup>, Chiara Buzzanca <sup>3</sup>, Giuseppe Micalizzi <sup>3</sup>, Paola Dugo <sup>3,5</sup>, Luigi Mondello <sup>3,5,6</sup> and Francesca Rigano <sup>3</sup>

<sup>1</sup> Center Agriculture Food Environment (C3A), University of Trento, 38098 Trento, Italy

<sup>2</sup> Department of Food Sciences and Nutrition, Faculty of Agriculture Food and Environment, University of Sana'a, Sana'a PO Box 1247, Yemen

<sup>3</sup> Department of Chemical, Biological, Pharmaceutical and Environmental Sciences, University of Messina, 98168 Messina, Italy

<sup>4</sup> Faculty of Science and Technology, Free University of Bozen-Bolzano, Piazza Università 5, 39100 Bolzano, Italy

<sup>5</sup> Chromaleont s.r.l., c/o, Department of Chemical, Biological, Pharmaceutical and Environmental Sciences, University of Messina, 98168 Messina, Italy

<sup>6</sup> Unit of Food Science and Nutrition, Department of Medicine, University Campus Bio-Medico of Rome, 00128 Rome, Italy

\* Correspondence: ghanya.alnaqeb@unitn.it (G.A.-N.); giovanna.ferrentino@unibz.it (G.F.)

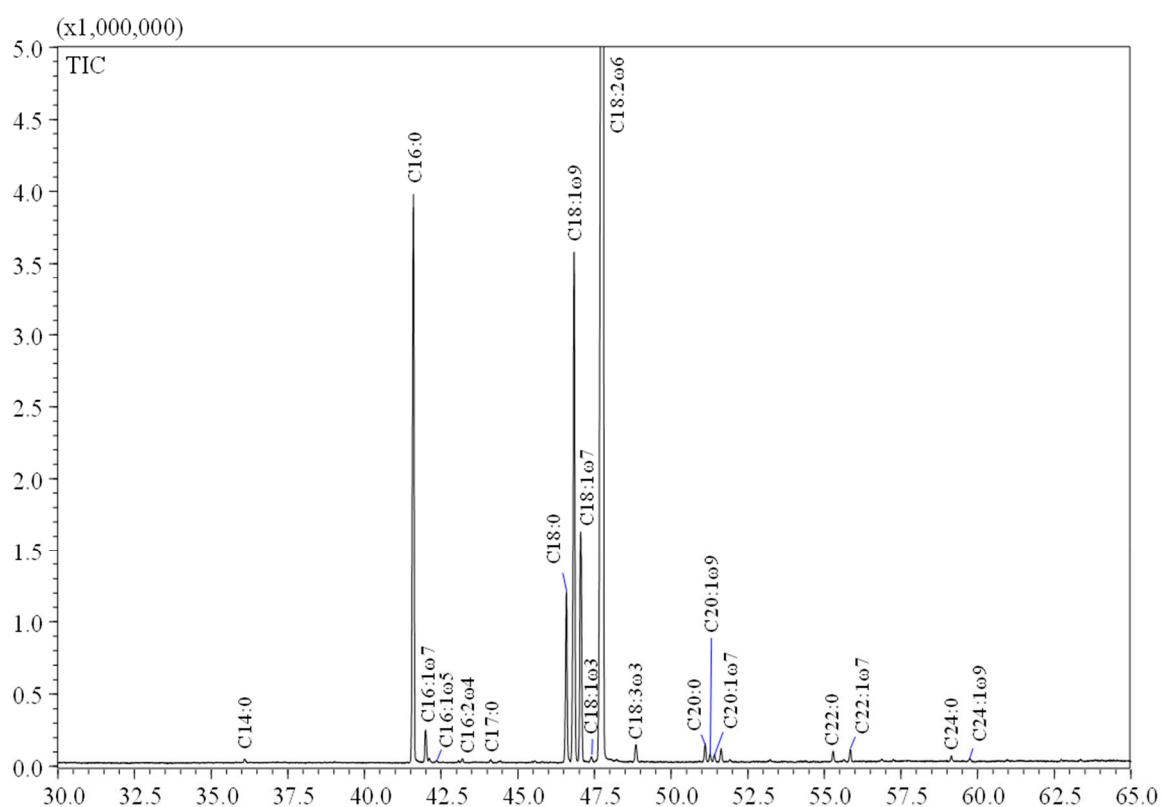

**Figure S1.** GC-FID chromatogram of FA profile of Yemen OFI seeds oil (YV1) extracted using SFE at 40 °C.

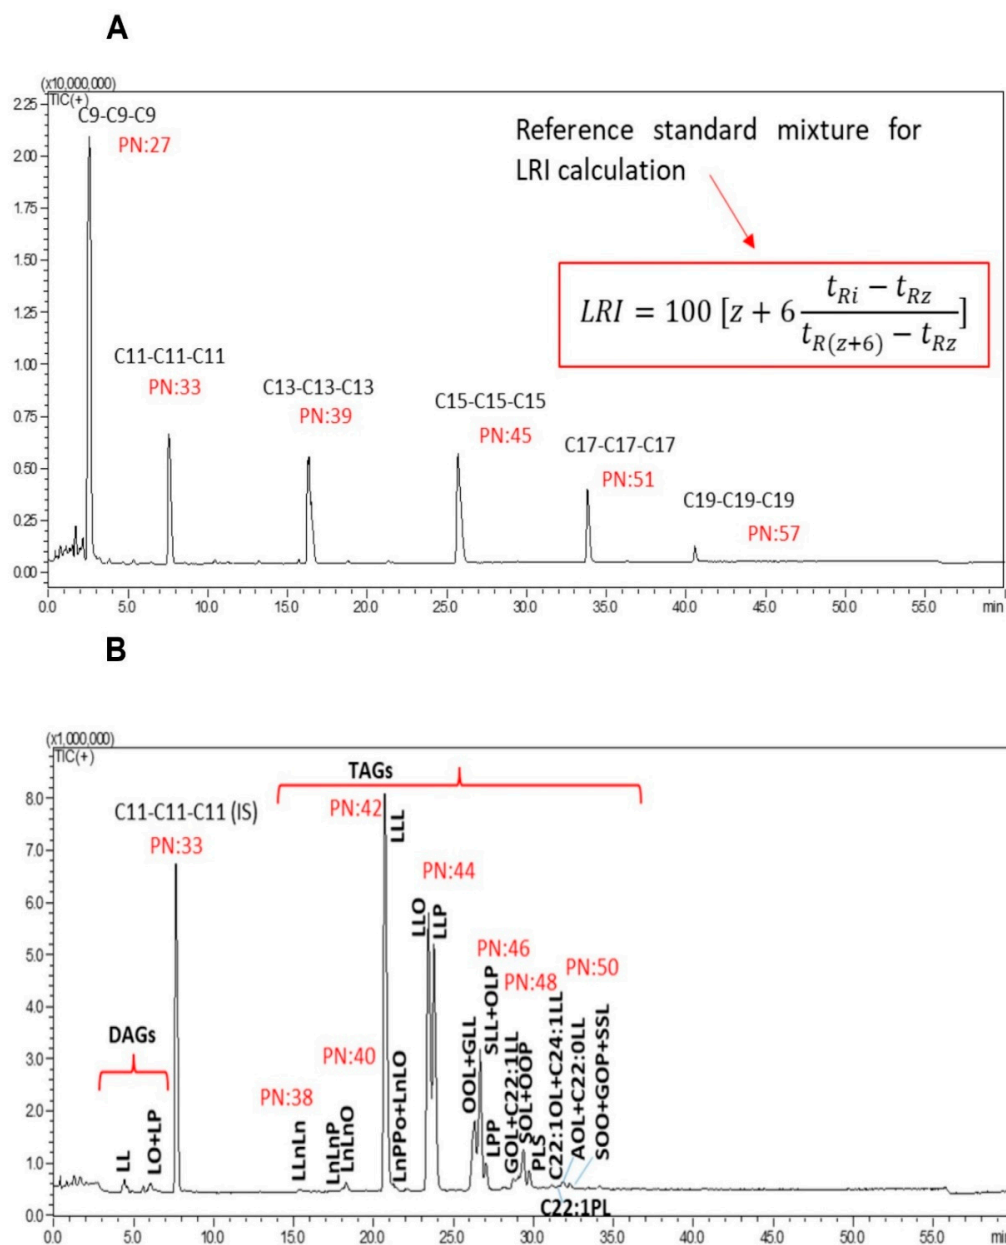

**Figure S2.** HPLC-MS chromatogram (A) and reference standard mixture (B) of YV1 sample.

**Table S1.** List of identified phenols in YV1, YV2 and I/S samples extracted by SFE and Soxhlet.

| Peak<br><i>n</i> | Compound name         | YV1 (area %) |           |         | YV2 (area %) |           |         | I/S (area %) |           |         |
|------------------|-----------------------|--------------|-----------|---------|--------------|-----------|---------|--------------|-----------|---------|
|                  |                       | SFE 60 °C    | SFE 40 °C | Soxhlet | SFE 60 °C    | SFE 40 °C | Soxhlet | SFE 60 °C    | SFE 40 °C | Soxhlet |
| 1                | Hydroxy-tyrosol       | 2.48         | 2.12      | -       | 7.52         | 2.38      | 6.48    | 0.42         | 0.28      | 6.38    |
| 2                | Tyrosol               | -            | 2.66      | -       | 2.65         | -         | 1.12    | 1.30         | 2.03      | 0.39    |
| 3                | Vanillin isomer       | -            | -         | 10.21   | -            | -         | 9.63    | -            | -         | 10.62   |
| 4                | Homovanillic acid     | 1.28         | 1.31      | 2.33    | 1.38         | 1.20      | 1.02    | 1.07         | 1.72      | 1.32    |
| 5                | Vanillic acid         | 17.78        | 13.58     | 17.40   | 16.66        | 20.00     | 11.26   | 18.48        | 18.72     | 12.80   |
| 6                | 4-hydroxybenzaldehyde | 6.65         | 12.71     | 12.04   | 15.30        | 12.04     | 29.17   | 8.71         | 9.51      | 26.59   |
| 7                | Syringic acid         | -            | 0.47      | 2.81    | 0.53         | 0.38      | 2.63    | 0.26         | 0.24      | 2.66    |
| 8                | Vanillin              | 44.20        | 39.16     | 31.86   | 30.72        | 36.58     | 26.40   | 48.11        | 38.75     | 24.96   |
| 9                | 4-hydroxycoumarin     | 9.54         | 4.82      | 1.93    | 6.45         | 7.57      | 1.20    | 4.78         | 11.52     | 0.95    |
| 10               | Syring-aldehyde       | 4.59         | 5.93      | 4.52    | 8.06         | 8.32      | 3.34    | 6.02         | 5.97      | 3.82    |
| 11               | Ferulic acid          | 0.57         | 0.56      | 4.02    | 0.62         | 0.91      | 1.86    | 0.60         | 0.61      | 2.09    |
| 12               | Cinnamic acid         | 0.78         | 0.64      | 1.44    | 0.63         | 0.69      | 0.90    | 0.73         | 0.70      | 0.97    |
| 13               | Ferul-aldehyde        | 10.09        | 7.00      | 8.23    | 7.56         | 8.42      | 3.95    | 8.46         | 8.41      | 5.04    |
| 14               | Sinapaldehyde         | 2.12         | 1.59      | 3.21    | 1.91         | 1.52      | 1.04    | 1.05         | 1.54      | 1.40    |
